# Supplementary material for: N,N-Dimethylglycine Sodium Salt Exerts Marked Anti-Inflammatory Effects in Various Dermatitis Models and Activates Human Epidermal Keratinocytes by Increasing Proliferation, Migration, and Growth Factor Release
Source: MDPI journal article supplement (doi:10.3390/ijms241411264), 2023-07-09
Supplement: s1 [file s1]

Article

# N,N-Dimethylglycine Sodium Salt Exerts Marked Anti-Inflammatory Effects in Various Dermatitis Models and Activates Human Epidermal Keratinocytes by Increasing Proliferation, Migration and Growth Factor Release

zzAlexandra Lendvai <sup>1,2</sup>, Gabriella Béke <sup>1</sup>, Erika Hollósi <sup>1</sup>, Maike Becker <sup>3</sup>, Jörn Michael Völker <sup>3</sup>, Erik Schulze zur Wiesche <sup>3,4</sup>, Attila Bácsi <sup>1,5</sup>, Tamás Bíró <sup>1</sup> and Johanna Mihály <sup>1\*</sup>

## A – Experiment 2

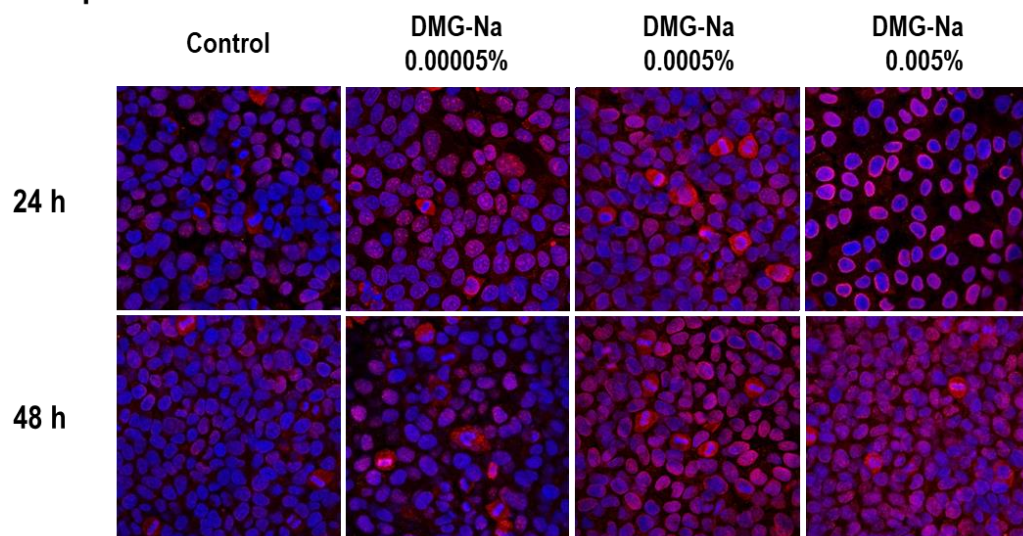

## B – Experiment 3

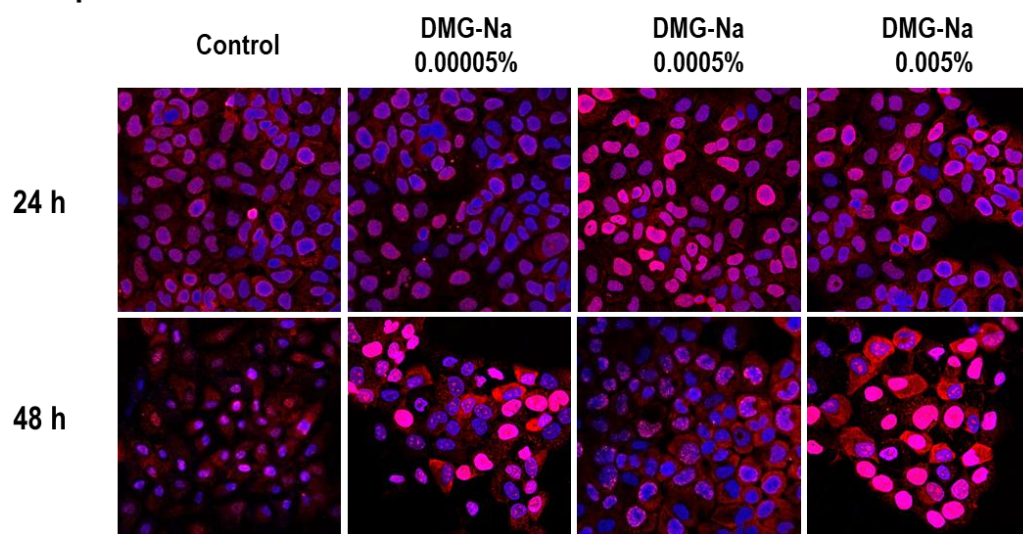

**Supplementary Figure S1.** Effects of DMG-Na on cellular proliferation of human epidermal HaCaT keratinocytes – Ki67 immunocytochemistry. Effects of various concentrations of DMG-Na on the protein level expression of the proliferation marker Ki67 after 24 and 48 h treatment. **A, B)** Representative images of Ki67 immunofluorescence labeling (Ki67: purple, DAPI: blue) of Experiment 2 and 3 (Experiment 1 is presented in **Figure 1C**).

## A – Experiment 2

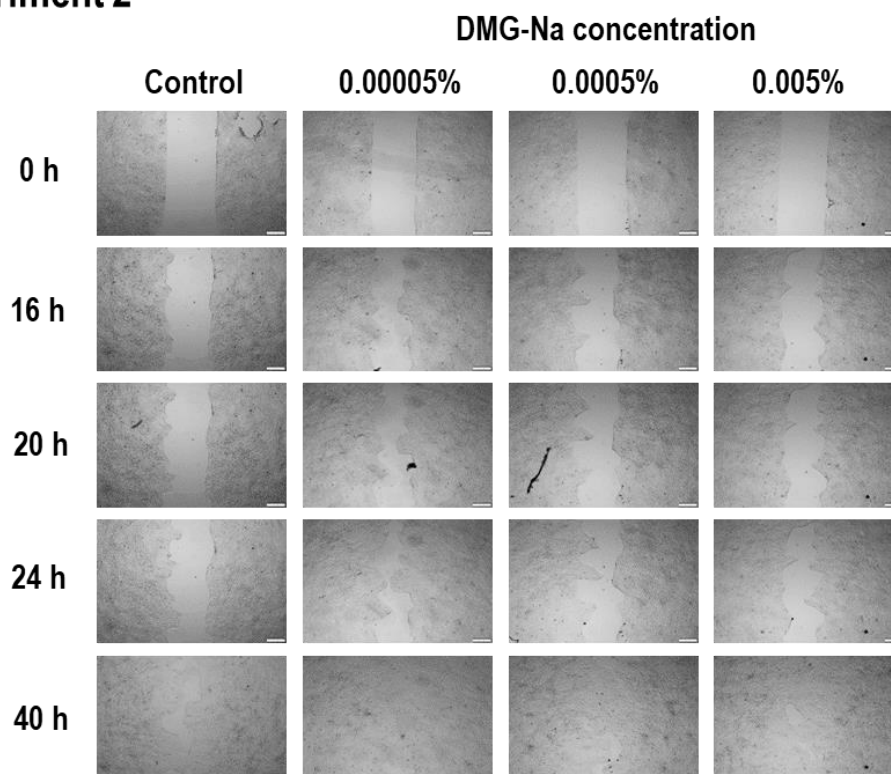

## B – Experiment 3

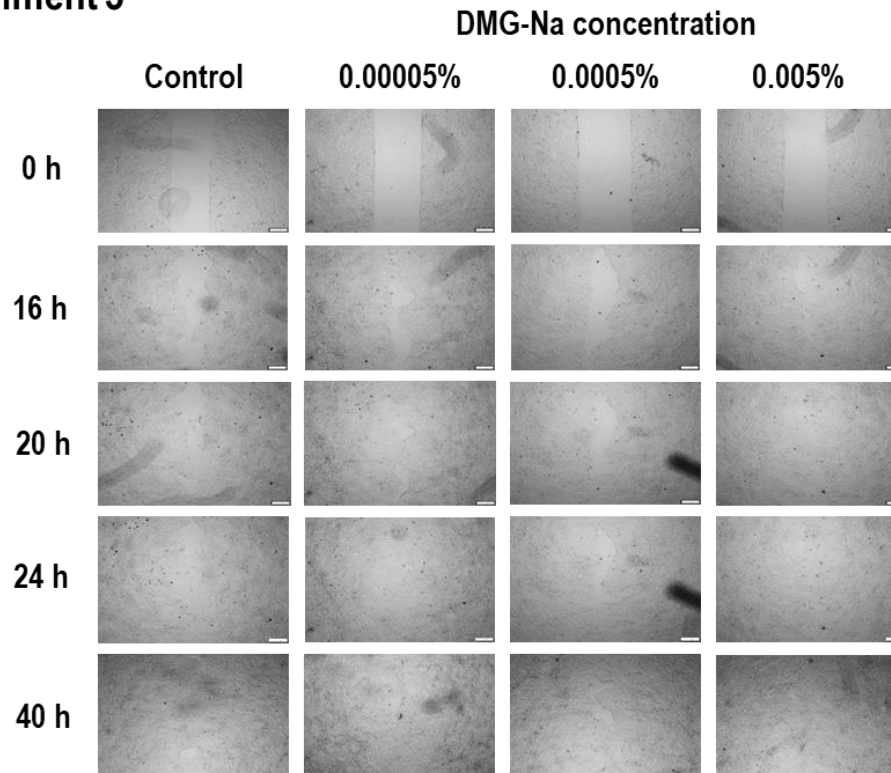

**Supplementary Figure S2.** Effects of DMG-Na on scratch wound closure (i.e. migration) of human epidermal HaCaT keratinocytes – Representative photomicrographs. Effects of various concentrations of DMG-Na on the migration of HaCaT keratinocytes were assessed at different time-points. Representative photomicrographs of Experiment 2 and 3 (Experiment 1 is presented in **Figure 2A**).

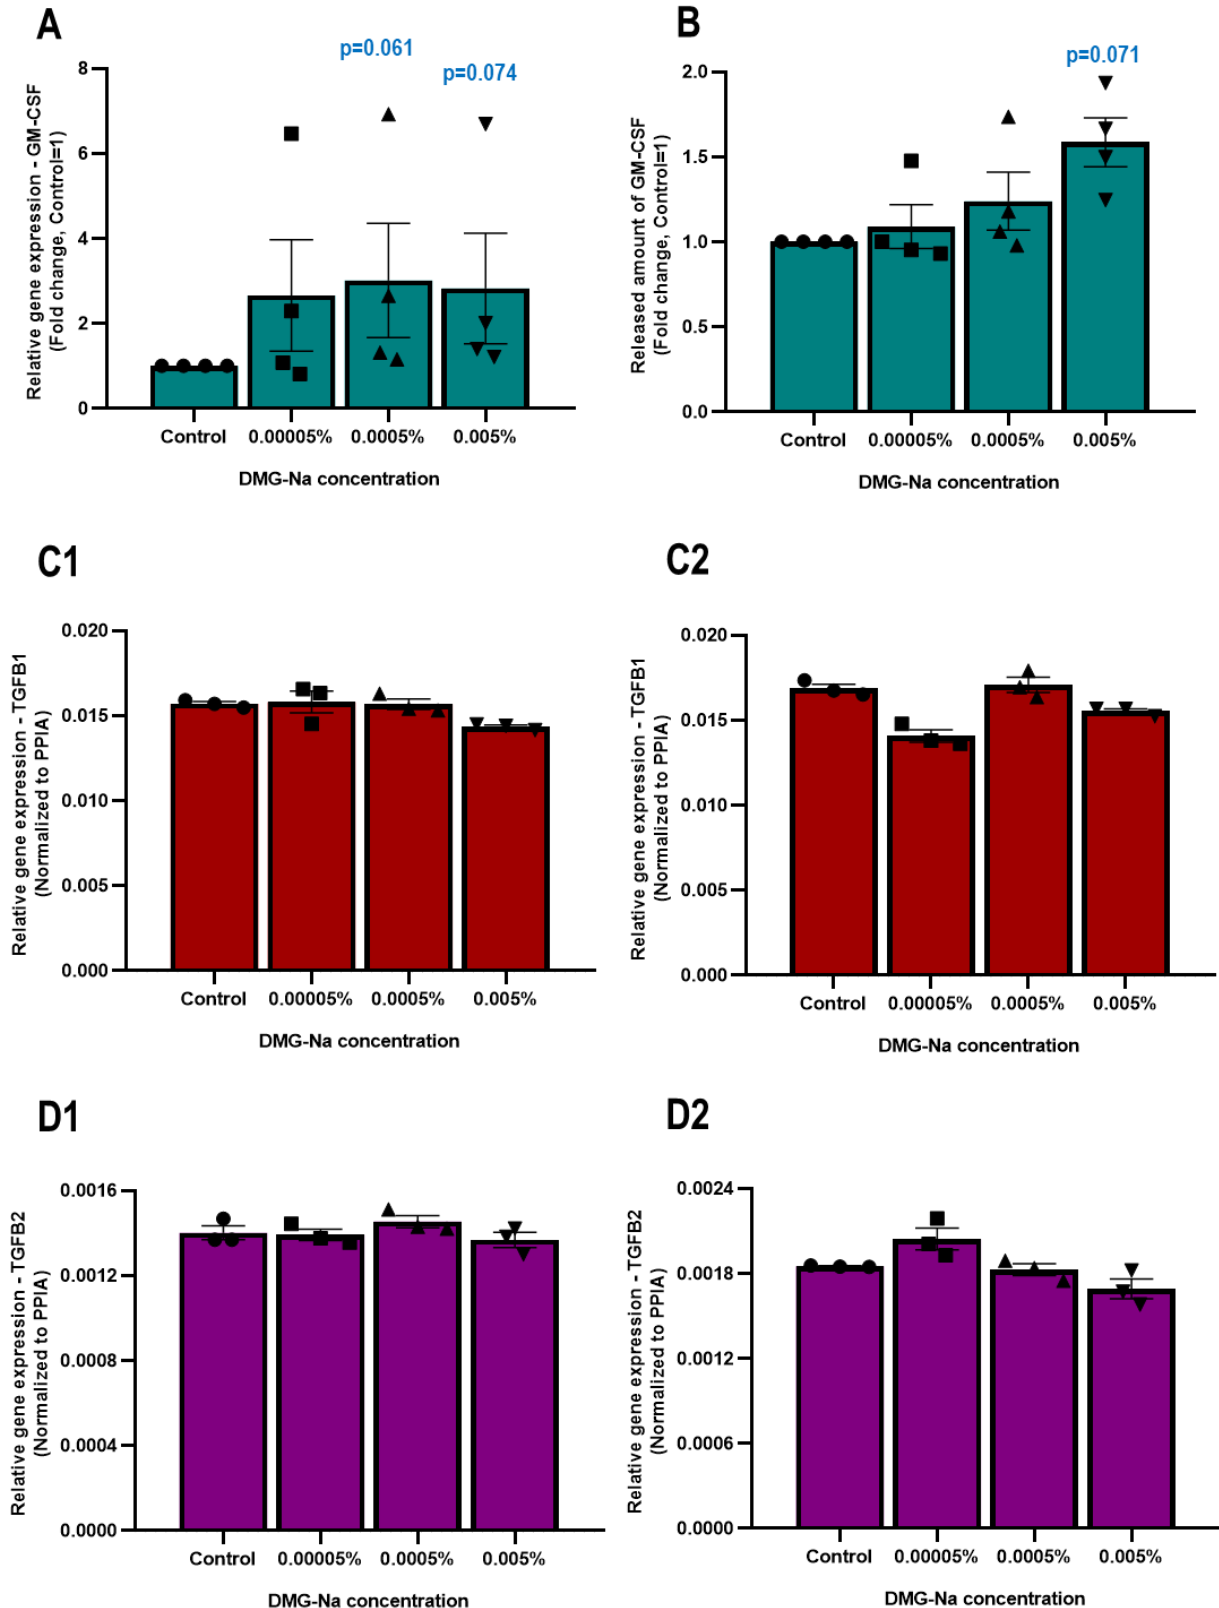

**Supplementary Figure S3.** Effects of DMG-Na on expression of growth factors in human epidermal HaCaT keratinocytes. **A, B**) Effects of various concentrations (0.00005%, 0.0005% and 0.005%) of DMG-Na on the mRNA level (**A**, qRT-PCR assay) and protein level release (**B**, ELISA assay) of granulocyte-macrophage colony-stimulating factor (GM-CSF) of HaCaT keratinocytes were assessed after 24 h of qRT-PCR and 48 h of ELISA treatment. Both panels show pooled data of independent experiments (n=4). Mean  $\pm$  SEM. Number shown statistical difference compared to control by ANOVA. **C, D**) Effects of various concentrations (0.00005%, 0.0005% and 0.005%) of DMG-Na on the mRNA level (qRT-PCR assay) of transforming growth factor (TGF) $\beta$ 1 (**C1, C2**) and TGF $\beta$ 2 (**D1, D2**) of HaCaT keratinocytes were assessed after 24 h in 2 independent experiment. Mean  $\pm$  SEM.

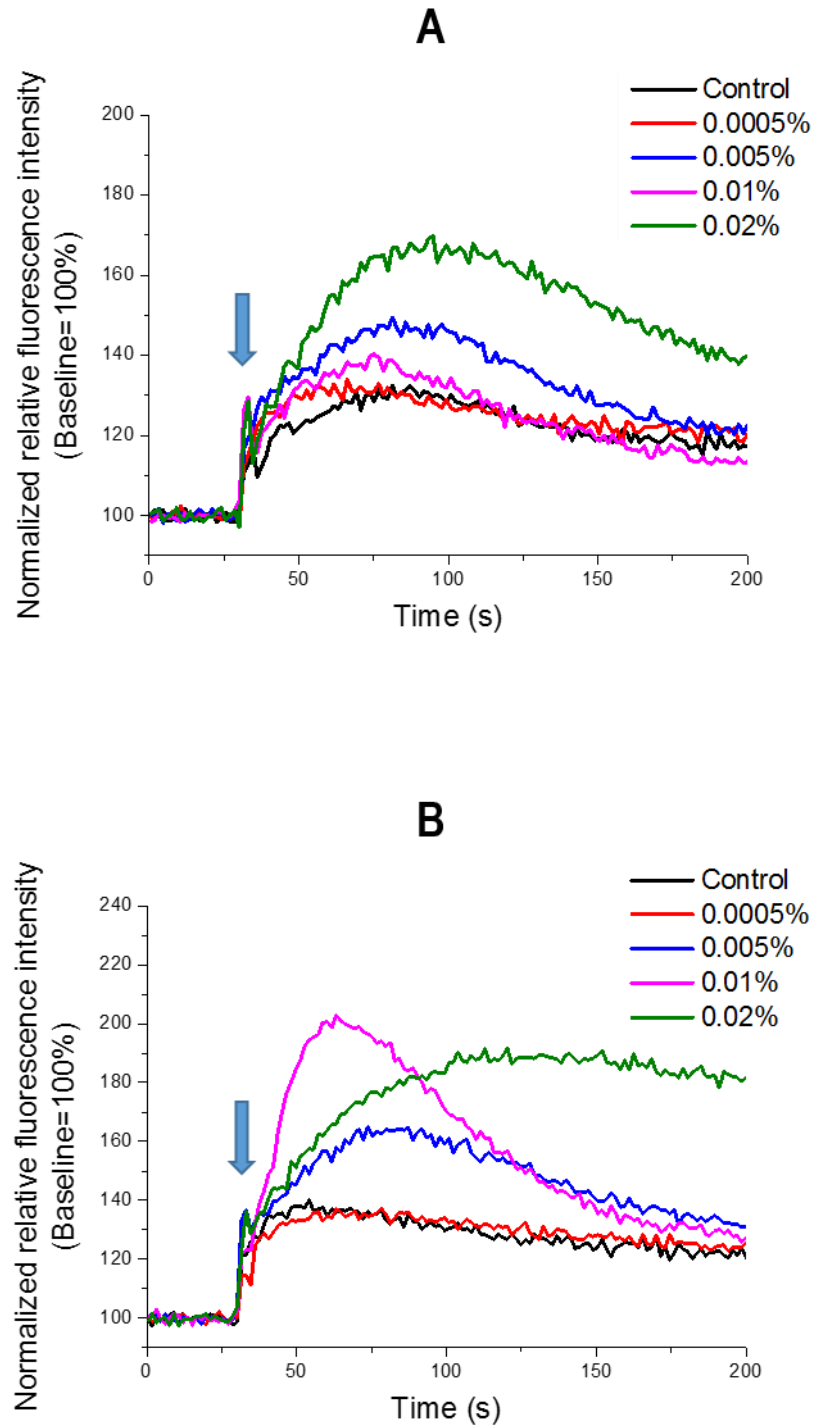

**Supplementary Figure S4.** Effects of DMG-Na on intracellular Ca concentration ( $[Ca^{2+}]_i$ ) of human epidermal HaCaT keratinocytes. Representative fluorimetric Ca imaging data recorded on Fluo-4-AM-loaded human epidermal HaCaT keratinocytes in 2 independent experiments (A, B). The arrow indicates the application of various concentrations (0.0005%, 0.005%, 0.01% and 0.02%) of DMG-Na in 1.8 mM  $Ca^{2+}$  containing solution.
